# Supplementary material for: Using wavelet transform and dynamic time warping to identify the limitations of the CNN model as an air quality forecasting system
Source: Copernicus journal article supplement (doi:10.5194/gmd-2019-346), 2020-03-09
Supplement: Supplementary file 1 [file gmd-2019-346-supplement.pdf]

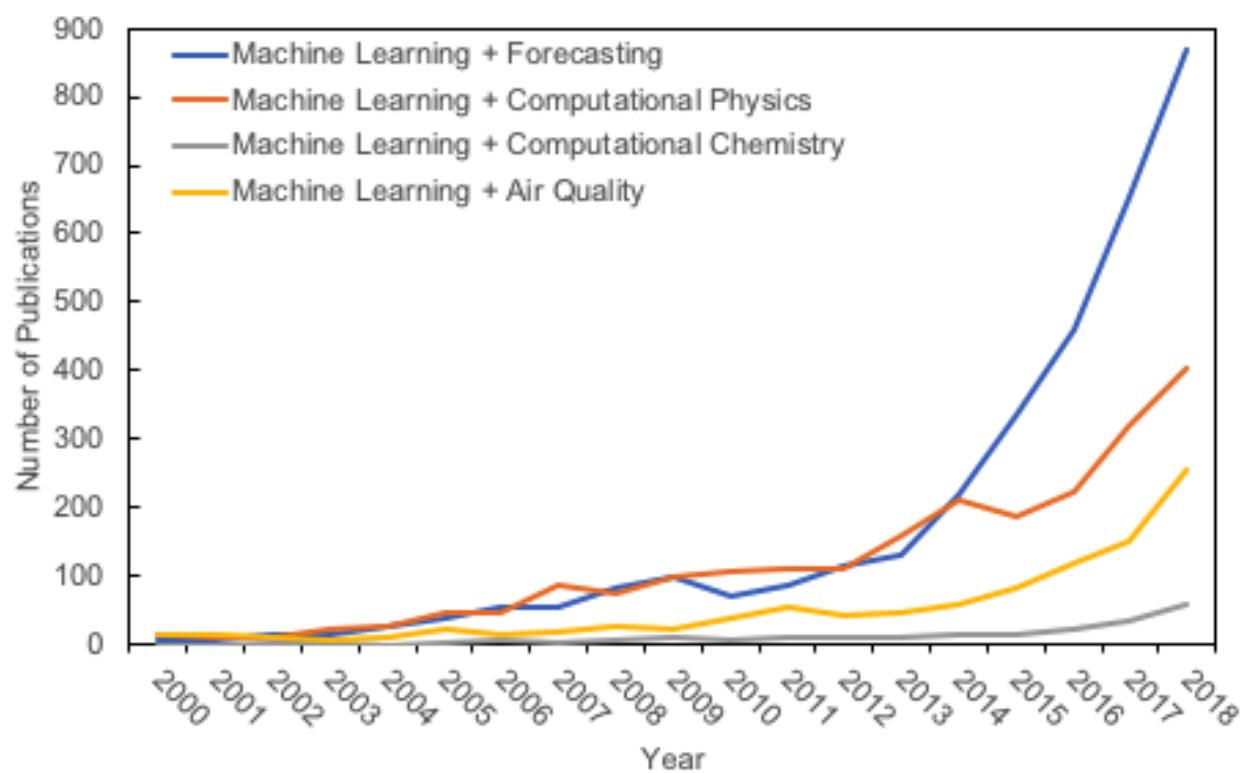

**Figure S1.** The number of machine learning-related publications on different topics from the Web of Science database.

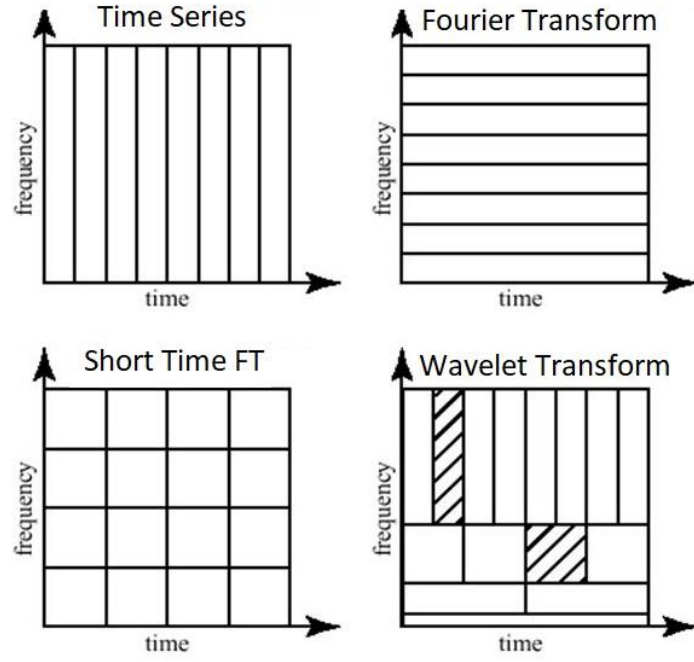

**Figure S2.** Schematics comparing wavelet transform to Fourier transform (FT).

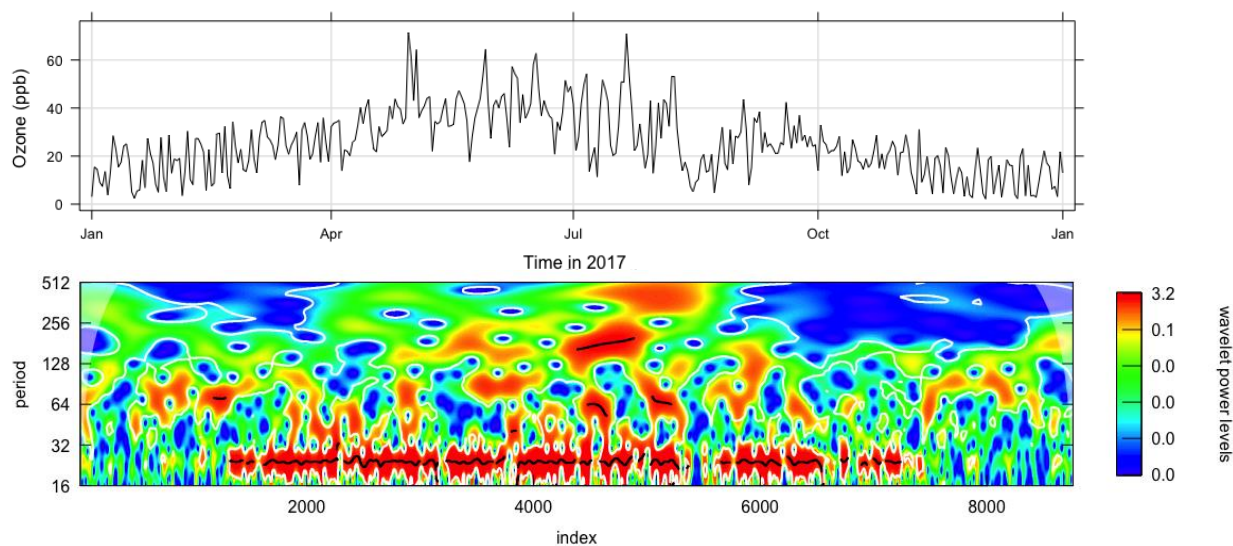

**Figure S3.** Time series and wavelet transform analysis of ozone concentrations from the NIER stations #111121 in Seoul, South Korea. Index at the x-axis as well as the period is in hours.

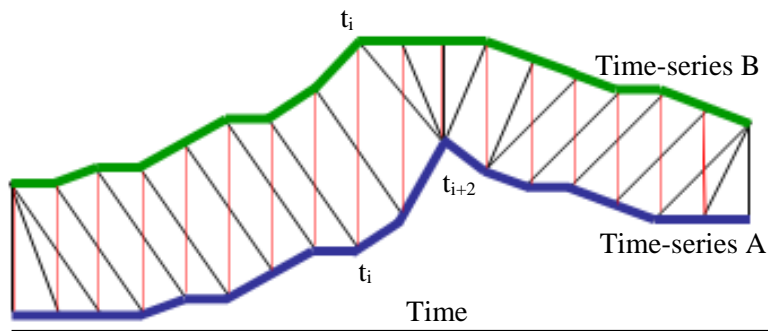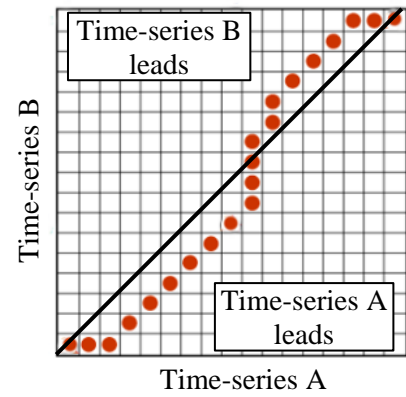

**Figure S4.** Comparison of time steps based on the DTW (black) and Euclidean distance (red) analysis.

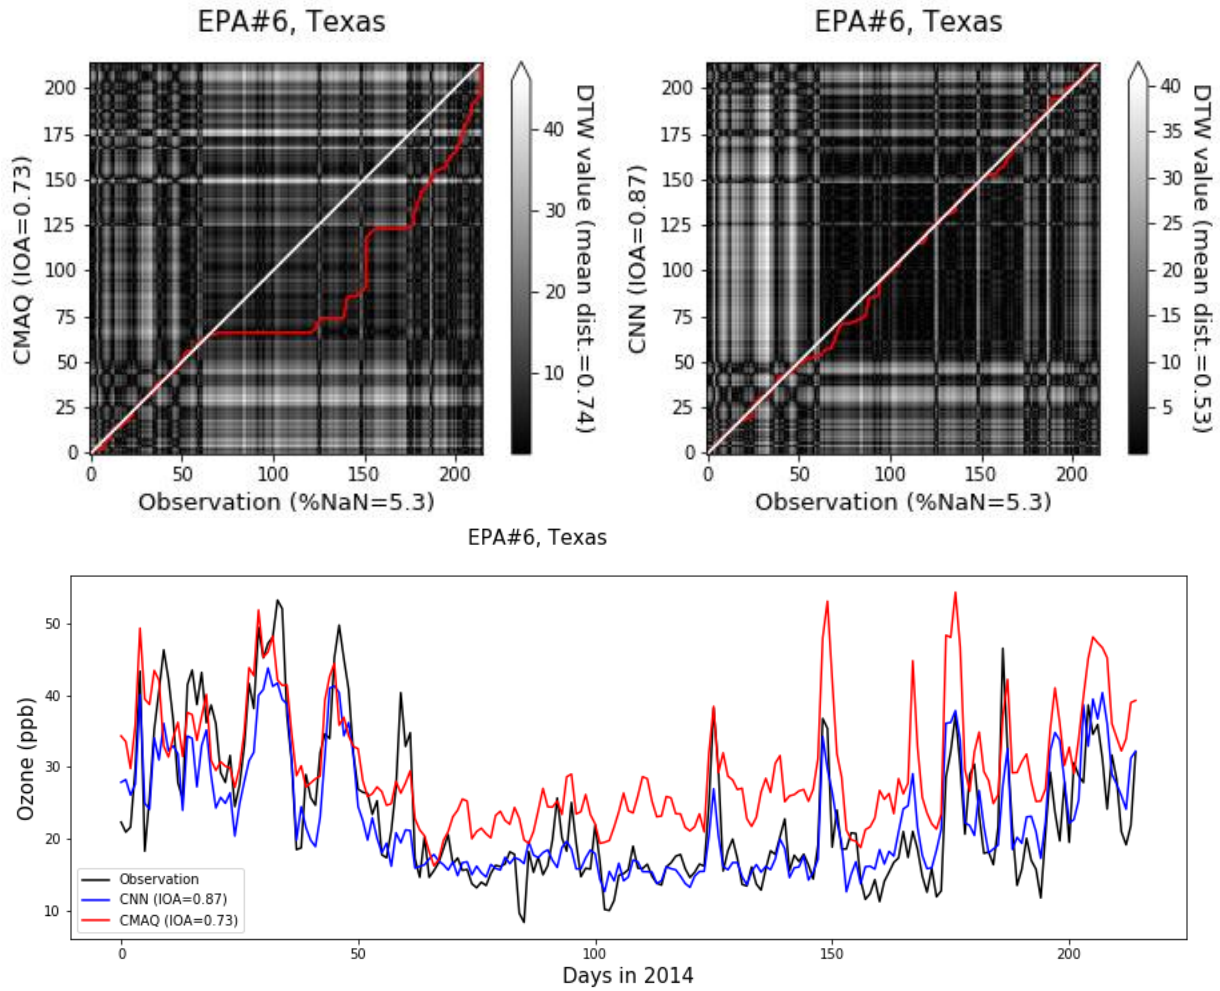

**Figure S5.** Distance plot calculated by DTW comparing similarities (red line) between observations and two prediction models (CNN in the top right and CMAQ in the top left panels).

Daily IOA of CNN prediction: average over 25 stations

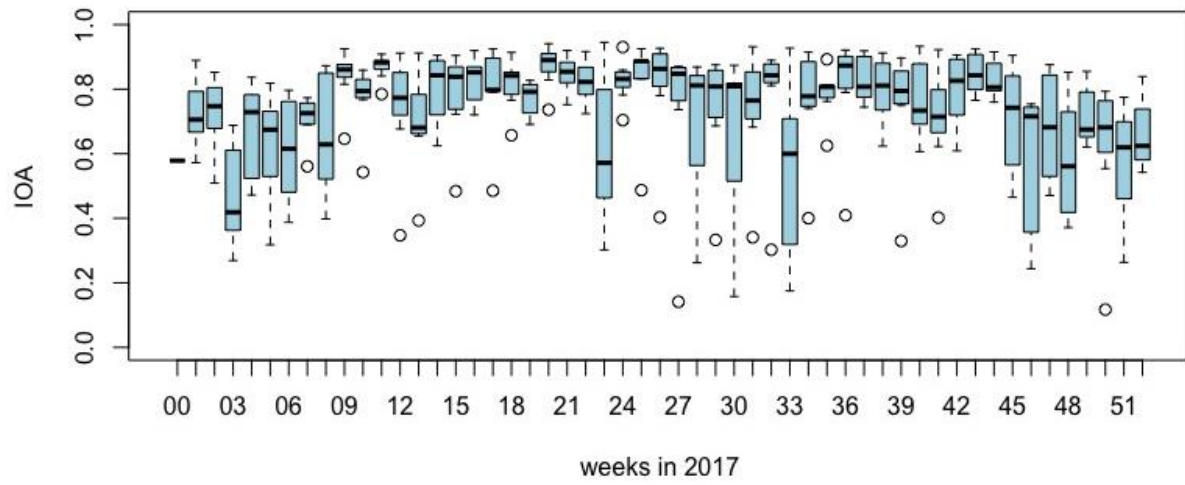

**Figure S6.** Box plot of daily IOAs of the CNN model in different weeks of 2017, averaged over 25 stations in Seoul, South Korea (from Eslami et al., 2019a).

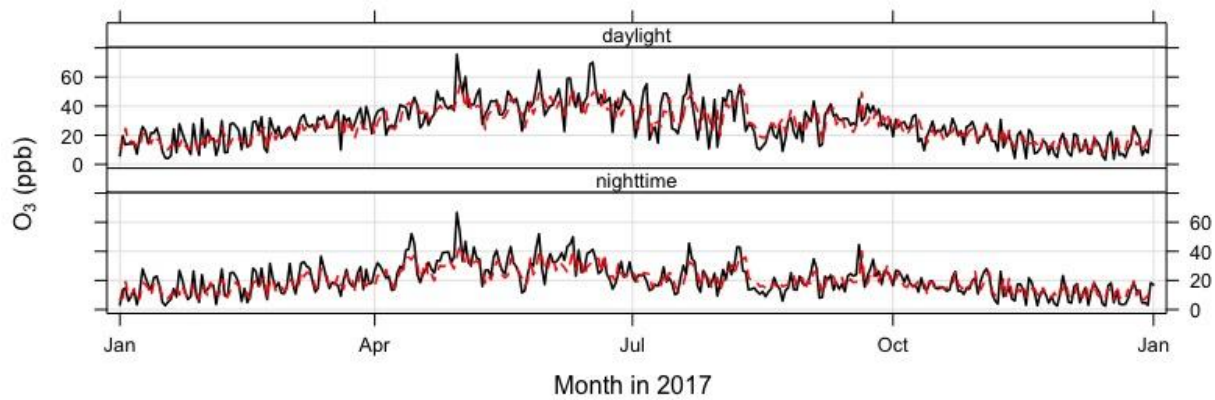

**Figure S7.** Time series showing daily CNN model predictions (in red) and observed ozone concentrations (in black) during the daytime and the nighttime, averaged over 25 stations in Seoul, South Korea (from Eslami et al., 2019a).

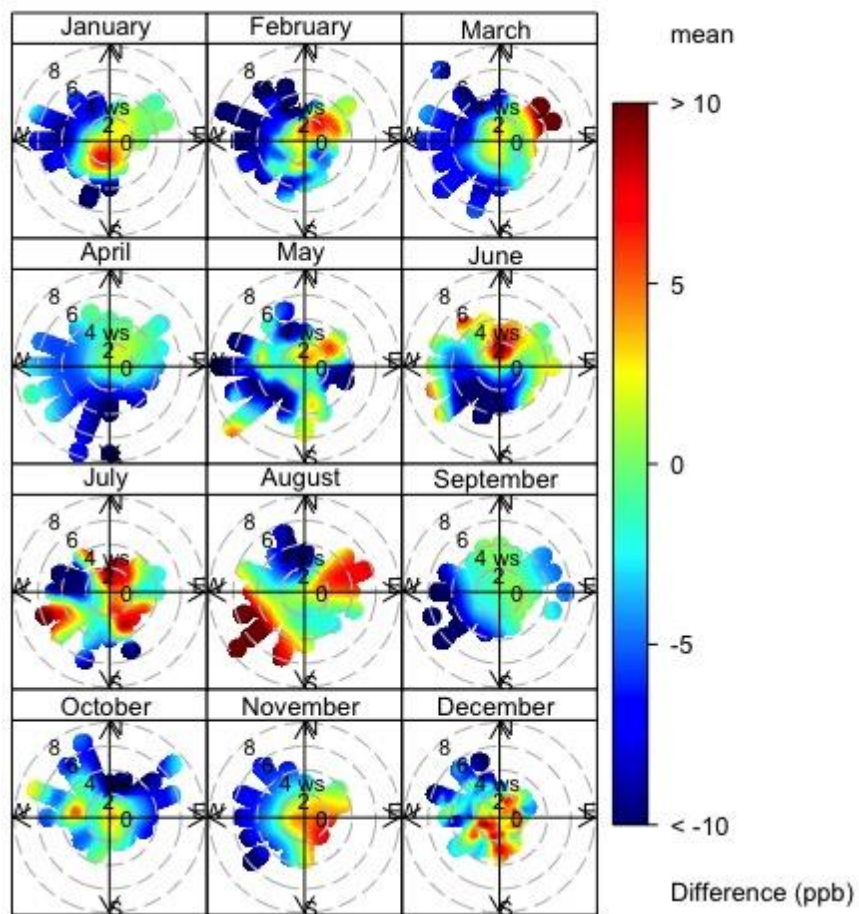

**Figure S8.** Polar frequency (with respect to wind fields) of errors in CNN ozone predictions, averaged over all stations in Seoul, South Korea, for different months.



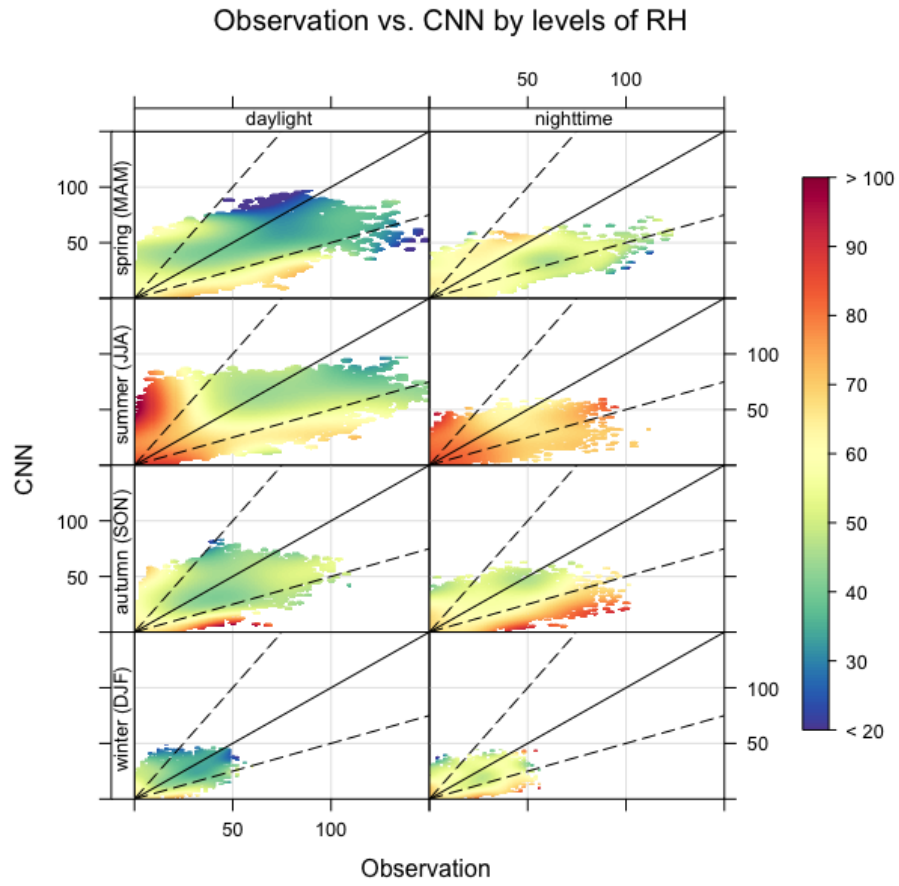

**Figure S9.** Scatter plots comparing CNN predictions with observed values in different seasons during the daytime and the nighttime.

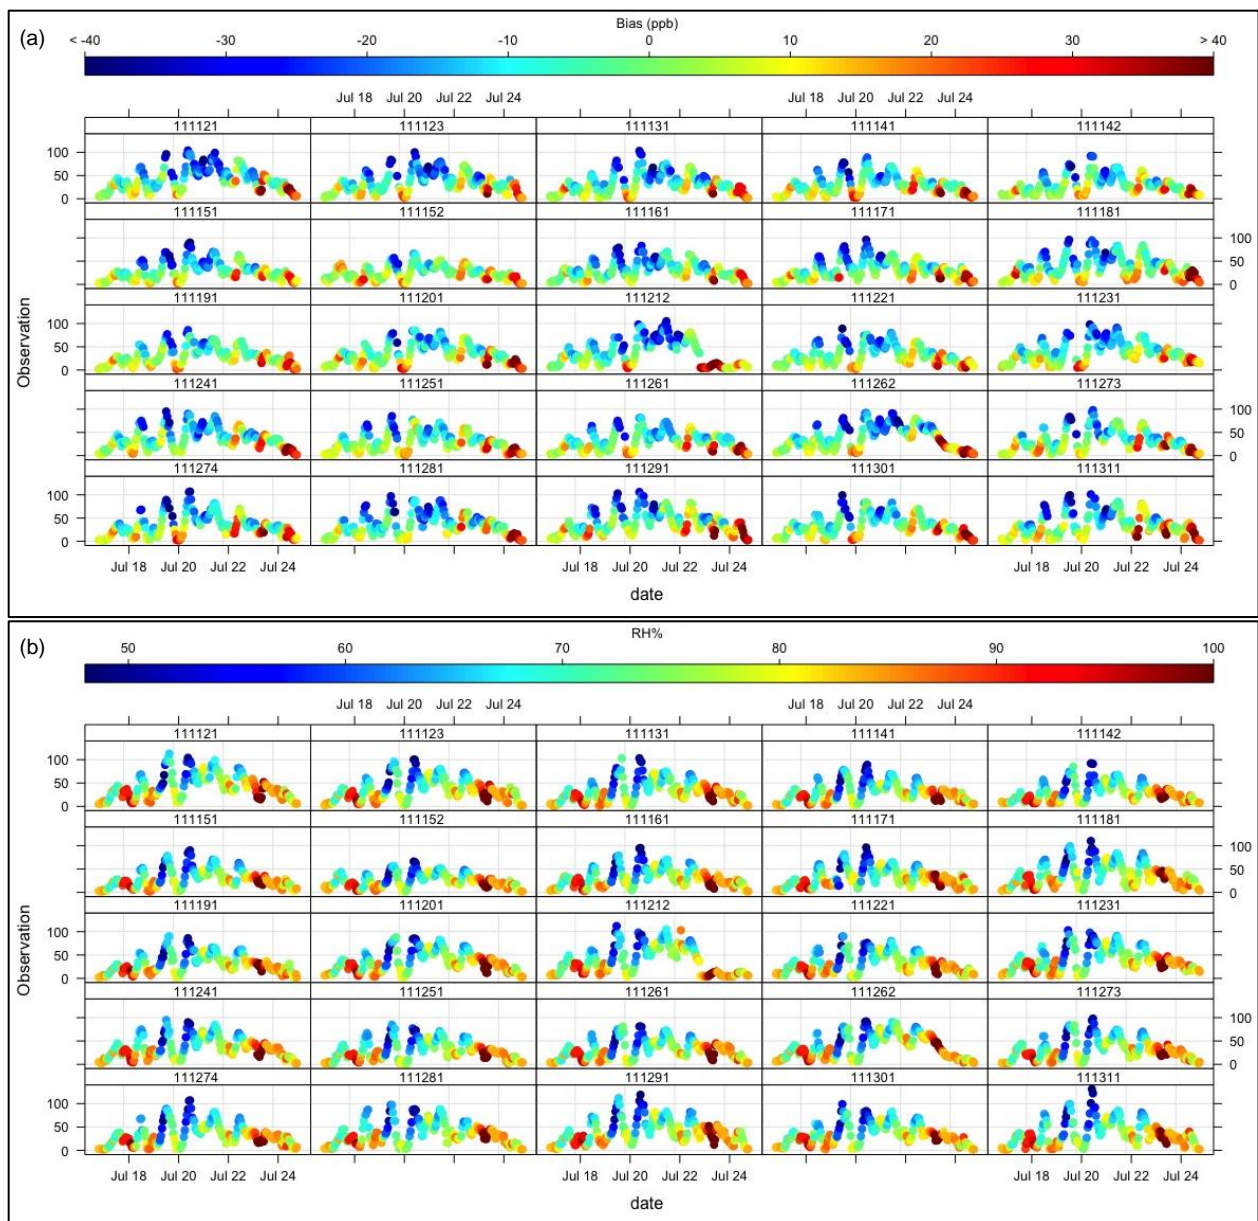

**Figure S10.** Hourly time series of a high ozone episode in Seoul, South Korea, with respect to (a) levels of CNN prediction bias and (b) levels of RH%.

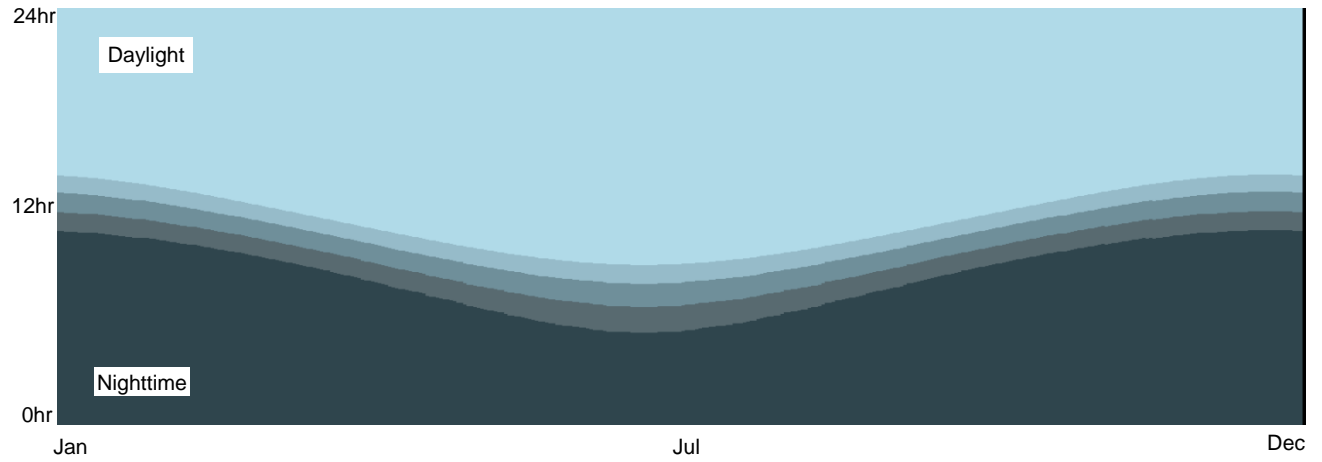

**Figure S11.** Variation in daylight and nighttime hours throughout the year in Seoul, South Korea.

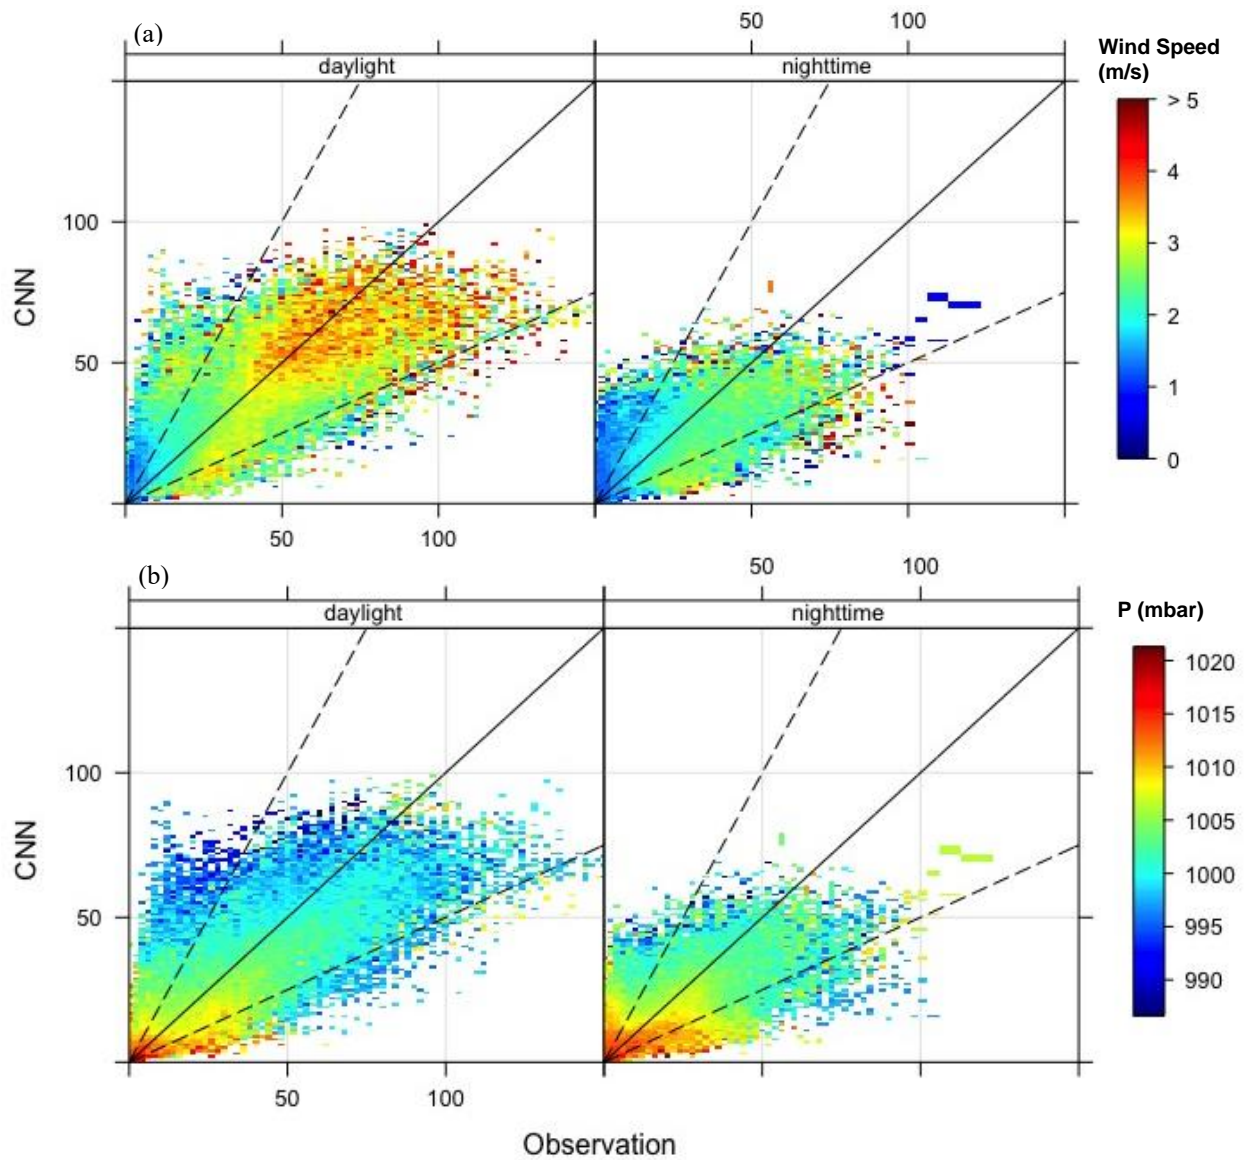

**Figure S12.** Scatter plots comparing CNN predictions and observations with respect to levels of (a) wind speed and (b) pressure.

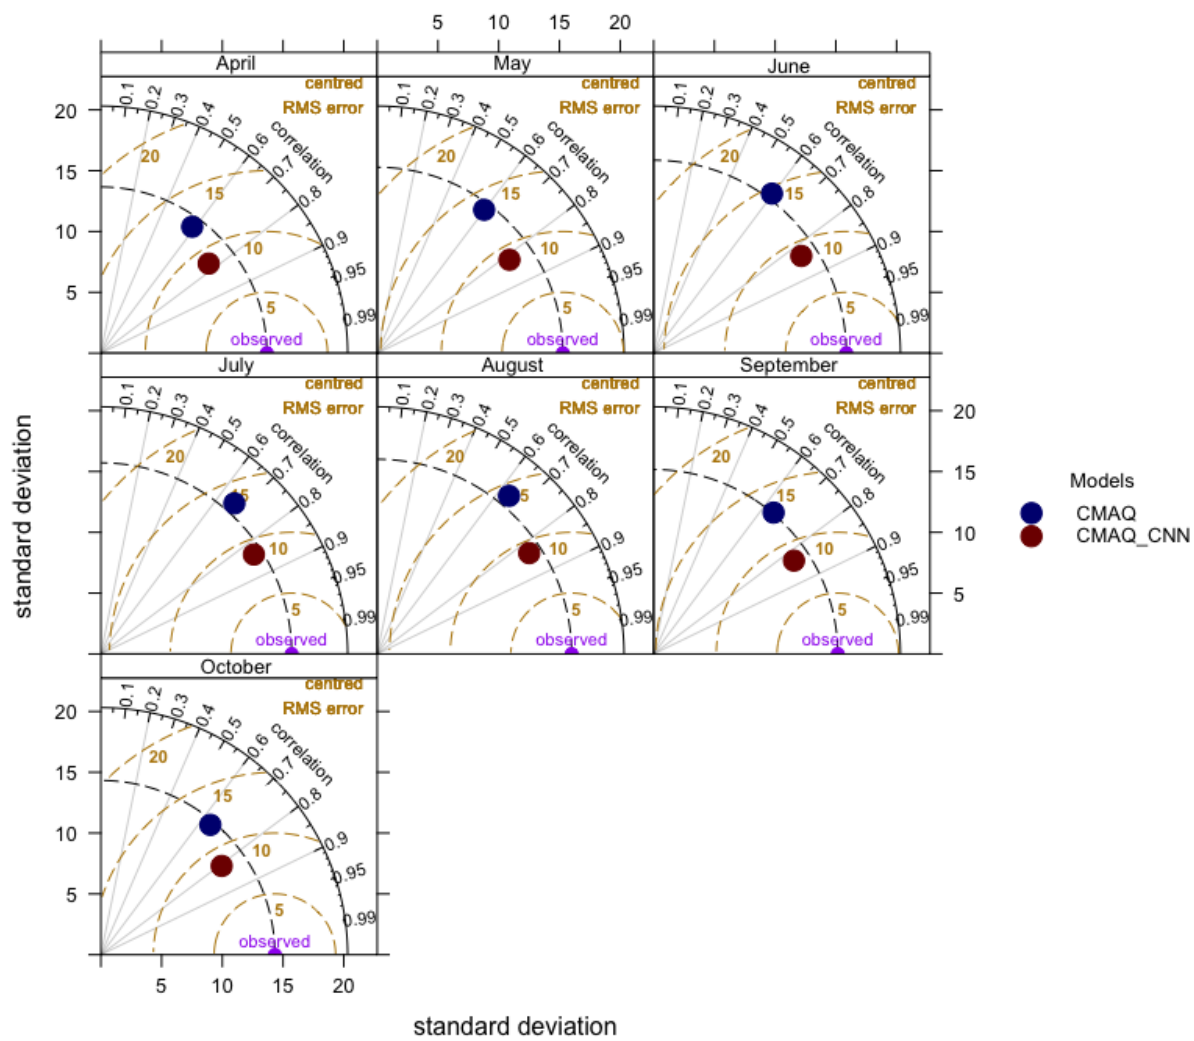

**Figure S13.** Taylor diagram comparing CMAQ and CMAQ-CNN models in different months of the 2014 ozone season, averaged over all stations across the continental United States.

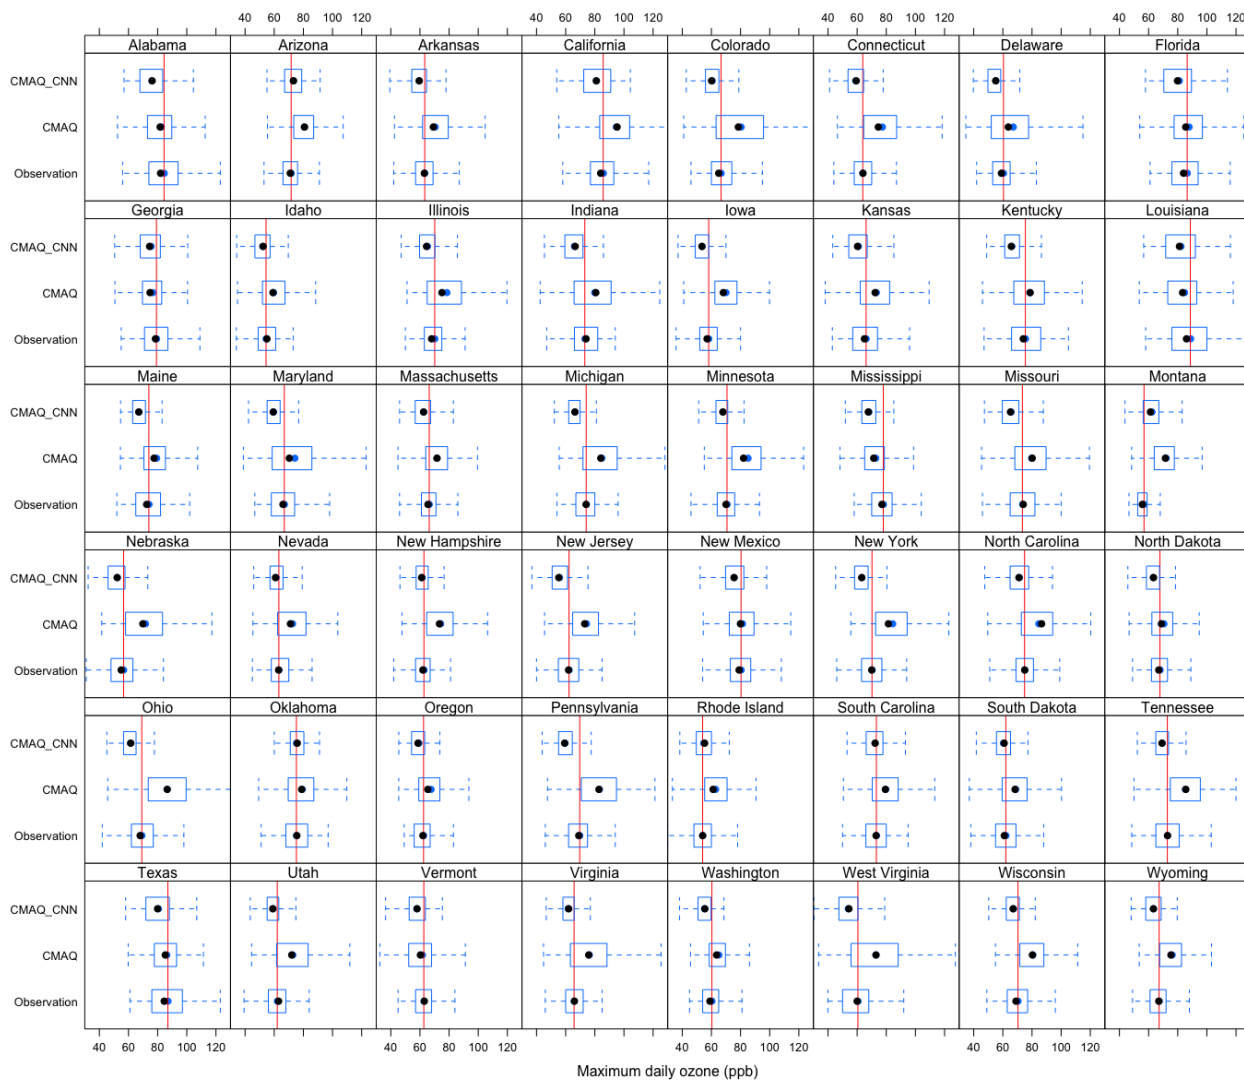

**Figure S14.** Box plots comparing daily maximum ozone of CMAQ and CMAQ-CNN models with observed values in 48 states in the continental United States. Red vertical lines represent the yearly mean of ozone peaks as a reference.
